# Supplementary material for: Regenerative Potential of Mesenchymal Stromal Cells: Age‐Related Changes
Source: Hindawi journal article supplement (doi:10.1155/2016/1461648), 2016-01-01
Supplement: f1 [file 1461648.f1.pdf]

## Supporting Information Legends

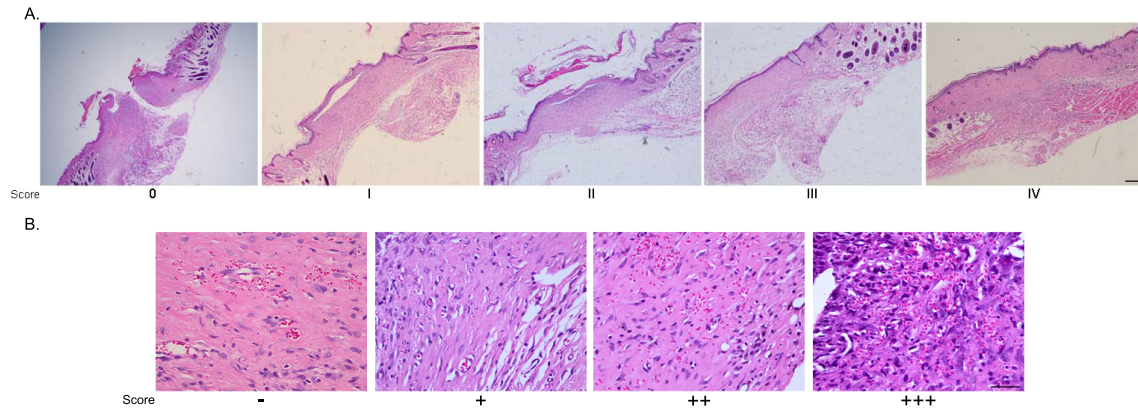

### Supplementary figure 1. (A) Dermo-epidermal junction histological scores.

Haematoxylin-eosin stained that represents the dermo-epidermal junction. Image J analysis software was used for estimating unbound area size.

0: > 2,801 area per pixels represents an incomplete junction

I: 1,201-2,800 area per pixels

II: 751-1,200 area per pixels

III: 401-750 area per pixels

IV: 0.1-400 area per pixels represents a complete junction

Scale bar 100  $\mu\text{m}$ .

**(B) Histological scores regarding leukocyte infiltration level.** (-) absent, (+)

mild, (++) moderate, (+++) severe. Scale bar 50  $\mu\text{m}$

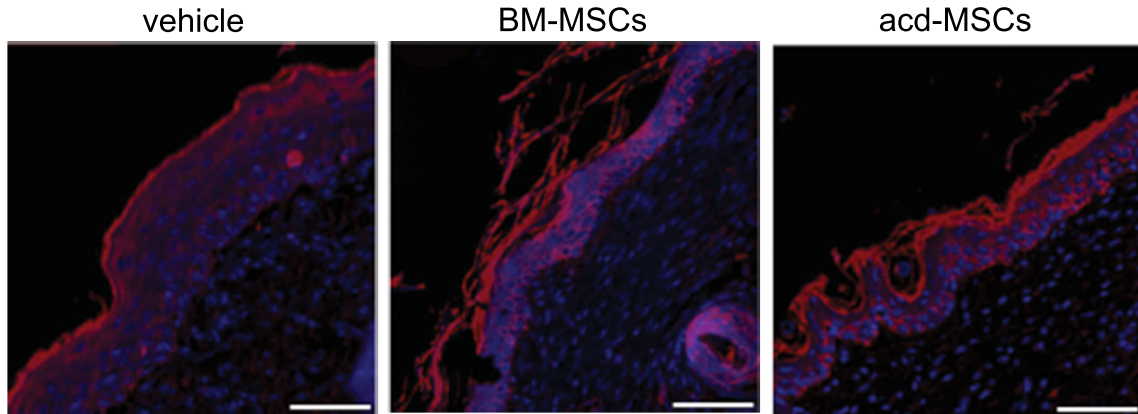

**Supplementary figure 2. Pan-cytokeratin expression 12 days after treatment.**

Keratinocytes were stained with a monoclonal antibody against epidermal keratin subunits and visualized with a secondary antibody: Alexa Fluor 647. DAPI was used for nuclear staining. The representative results of 5-15 animals per experimental group. Scale bar 50  $\mu\text{m}$ .

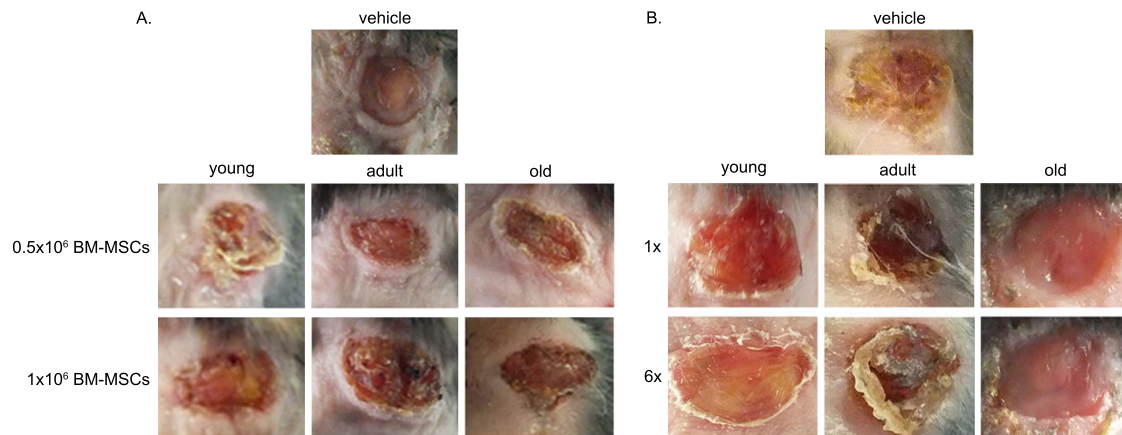

**Supplementary figure 3. Granulation tissue formation (A)** After 4 days the bed

of a wound treated with bmMSCs isolated from young, adult and old female C57BL/6 donors and **(B)** the bed of a wound treated with acd-MSCs.

## Tables

### Supplementary table 1. Statistical data of flow cytometry.

Percentage of cells positive for the marker

| Age   | CD90.2 | Sca-1 | ASMA |
|-------|--------|-------|------|
| Young | 65.2   | 75.7  | 95.4 |
| Adult | 63.8   | 77.3  | 96.1 |
| Old   | 60.2   | 93.7  | 88.3 |

Mean fluorescence intensity (isotype / marker)

| Age   | CD90.2 |      | Sca-1 |       | ASMA |       | CD45.2 |      | CD11b |      |
|-------|--------|------|-------|-------|------|-------|--------|------|-------|------|
| Young | 21.5   | 73.6 | 7.8   | 126.5 | 6.8  | 387.5 | 5.3    | 10.9 | 5.1   | 7.8  |
| Adult | 16.1   | 49.4 | 4.2   | 59.2  | 6.8  | 922.0 | 4.2    | 4.6  | 5.1   | 6.8  |
| Old   | 16.8   | 46.0 | 2.8   | 162.8 | 5.3  | 57.1  | 4.2    | 5.9  | 7.0   | 11.3 |

### Supplementary table 2. Primer and amplicon characteristics.

| Gene              | GenBank            | Sequences<br>5'→3'                                                       | Amplicon<br>Tm<br>size<br>(°C)<br>(bp) |     | Reference                                                                                               |
|-------------------|--------------------|--------------------------------------------------------------------------|----------------------------------------|-----|---------------------------------------------------------------------------------------------------------|
| KGF (FGF-7)       | NM_008008<br>.4    | F-<br>TGAGTCCGGAGCAAACG<br>GCT<br>R-<br>TGAGTCCGGAGCAAACG<br>GCT         | 86                                     | 131 | [1]                                                                                                     |
| IGF-1             | NM_010512<br>.3    | F-<br>TGGATGCTCTCAGTTCG<br>TG<br>R-<br>GCTTTGGGCATGTCAGTG<br>TG          | 88                                     | 220 | [2]                                                                                                     |
| HGF               | NM_001289<br>458.1 | F-<br>TCTGCTCGAACTGCAAG<br>CATGA<br>R-<br>TCCTGATACACCTGTTGG<br>CACACT   | 86                                     | 250 | <a href="http://pga.mgh.harvard.edu/primerbank/">http://pga.mgh.harvard.edu/primerbank/</a> PRIMER BANK |
| VEGF alpha        | NM_001025<br>257.3 | F-<br>AGGAGAGCAGAAGTCCC<br>ATGAAGT<br>R-<br>GGTGAGGTTTGATCCGC<br>ATGATCT | 88                                     | 242 | [3]                                                                                                     |
| VEGF delta        | NM_010216<br>.1    | F-<br>CCGGTTGAAGCTCAAAA<br>GTCTTGC<br>R-<br>CCTCCACACCGGAAGAC<br>ATTTACA | 86                                     | 231 | [3]                                                                                                     |
| ANG 1             | XM_006520<br>323.1 | F-<br>TGCACTAAAGAAGGTGT<br>TTTGCT<br>R-<br>CCTCCCCATTACATCC<br>ATATT     | 83                                     | 176 | <a href="http://pga.mgh.harvard.edu/primerbank/">http://pga.mgh.harvard.edu/primerbank/</a> PRIMER BANK |
| ANG 2             | NM_007426<br>.4    | F-<br>CCTCGACTACGACGACT<br>CAGT<br>R-<br>TCTGCACCACATTCTGTT<br>GGA       | 84                                     | 148 | <a href="http://pga.mgh.harvard.edu/primerbank/">http://pga.mgh.harvard.edu/primerbank/</a> PRIMER BANK |
| Collagen<br>type1 | NM_007742<br>.3    | F-<br>AGAACATCACCTATCAC<br>TGCAAGA<br>R-<br>GTGGTTTTGTATTGATG<br>ACTGTCT | 89 <sup>a</sup>                        | 205 | [4]                                                                                                     |
| MMP1              | NM_008607<br>.2    | F-<br>GAACATCCATCCCCTGA<br>CCTT<br>R-<br>AAGAGGGTCTTCCCCTG<br>CTT        | 85                                     | 173 | our design PRIMER PREMIER 5.0                                                                           |
| MMP3              | NM_010809<br>.1    | F-<br>ACATGGAGACTTTGTCCC<br>TTTTG<br>R-<br>TTGGCTGAGTGGTAGAG<br>TCCC     | 86                                     | 192 | <a href="http://pga.mgh.harvard.edu/primerbank/">http://pga.mgh.harvard.edu/primerbank/</a> PRIMER BANK |
| GAPDH             | NM_001289<br>726.1 | F-<br>ACTCCACTACGGCAA<br>TTC<br>R-<br>TCTCCATGGTGGTGAAG<br>ACA           | 86                                     | 171 | [5]                                                                                                     |
